# Supplementary material for: Identification of FAM173B as a protein methyltransferase promoting chronic pain
Source: PLoS Biol. 2018 Feb 14;16(2):e2003452. doi: 10.1371/journal.pbio.2003452 (PMC5828452; doi:10.1371/journal.pbio.2003452)
Supplement: S1 Data — (XLSX) [file pbio.2003452.s001.xlsx]

## Sheet: Fig 1a
		mFAM173b expression after knockdown
	DRG			Spinal Cord
	MM asODN	FAM173b asODN		MM asODN	FAM173b asODN
	0.620042	0.620042		0.667658	0.462259
	0.737358	0.566614		0.549877	0.893602
	1.04278	0.510661		0.686412	0.648404
	1.22301	0.624355		0.735696	0.695814
	1.18957	0.521191		1.20319	1.20319
	1.00726	0.613878		1.5935	1.5935
	1.03558	0.712241		1.22848	1.22848
	1.1444	0.774017		1.33519	1.33519
Mean	1	0.617875		1	1.00755
SEM	0.0759486	0.031853		0.136234	0.138503
N (mice)	8	8		8	8

## Sheet: Fig 1b
	mFAM173B knockdown Hargreaves
	veh: MM asODN										MEAN	SEM	N (animals)
	0	7.33958	7.2025	7.72736	7.57764						7.46177	0.117656	4
	1	7.53708	6.9875	8.21	7.1275						7.46552	0.274186	4
	4	7.8175	7.77667	8.10583	7.92833						7.90708	0.0735905	4
	5	6.915	7.47	7.855	8.05708						7.57427	0.251235	4
	6	6.2	6.1775	8.05694	7.70431						7.03469	0.4937	4
	7	6.36667	7.11583	6.86	7.3825						6.93125	0.216319	4
	8	6.63167	6.285	6.92	7.2						6.75917	0.196064	4
	9	6.94	7.38	6.7125	6.5925						6.90625	0.173579	4
	10	7.88417	7.2125	6.83083	7.05833						7.24646	0.226561	4
	11	6.93833	6.95	7.1475	6.9475						6.99583	0.0506177	4
	veh: FAM173b asODN										MEAN	SEM	N (mice)
	0	7.42667	7.41597	7.64244	7.59528						7.52009	0.0578736	4
	1	8.7725	6.19667	7.47917	7.72833						7.54417	0.529363	4
	4	6.85583	7.8925	7.835	7.63833						7.55542	0.239458	4
	5	7.48	6.95667	7.71222	7.33139						7.37007	0.158522	4
	6	7.7075	6.1325	6.995	7.15						6.99625	0.326034	4
	7	7.06667	7.4725	7.515	7.6275						7.42042	0.122366	4
	8	6.37417	6.8175	7.0775	7.25						6.87979	0.190543	4
	9	7.75	7.1425	7.19583	7.3425						7.35771	0.137429	4
	10	8.15	6.8275	7.0725	7.1775						7.30687	0.290449	4
	11	7.2325	6.86583	7.01	7.0875						7.04896	0.0764992	4
	CFA: MM asODN										MEAN	SEM	N (mice)
	0	7.46028	7.49222	7.43819	7.76486	7.78361	7.39903	7.57778	7.18967		7.5132	0.0690757	8
	1	2.23583	2.4275	2.4175	1.8275	2.75917	2.505	2.34417	2.3475		2.35802	0.0933093	8
	4	3.235	3.315	3.09	2.84	3.1425	3.23875	2.82	3.04583		3.09089	0.0646249	8
	5	2.2175	3.42	2.16167	3.265	3.03139	3.00208	2.52389	2.92333		2.81811	0.165325	8
	6	2.37	2.51	2.6175	2.6075	3.23	3.3125	2.6125	3.67167		2.86646	0.166183	8
	7	3.02167	2.18567	2.0575	3.115	3.03	2.685	2.1	3.41333		2.70102	0.185694	8
	8	2.5425	2.69833	2.95667	3.01	2.76	2.94833	2.40917	2.93		2.78188	0.0774495	8
	9	2.83667	2.42833	2.3275	2.67833	3.00667	2.98194	2.37389	3.33833		2.74646	0.126899	8
	10	2.4525	2.54667	2.105	2.48	3.12	3.325	2.3425	3.3325		2.71302	0.16801	8
	11	2.0875	2.8475	2.0175	2.335	2.78167	2.98167	2.2225	4.03917		2.66406	0.235015	8
	CFA: FAM173b asODN										MEAN	SEM	N (mice)
	0	7.09472	7.885	7.57083	8.66083	7.36097	7.92944	8.46611	7.93917		7.86339	0.18606	8
	1	3.5475	2.805	3.11	3.3225	2.85375	2.23083	2.35833	2.07		2.78724	0.188101	8
	4	3.225	3.2025	3.075	2.8275	3.3225	3.24833	3.20333	3.54		3.20552	0.0716791	8
	5	2.8375	2.51333	3.525	2.1625	3.7075	3.0075	3.31	3.315		3.04729	0.185083	8
	6	4.0025	3.66	3.185	4.4975	4.155	3.575	4.5	3.555		3.89125	0.168258	8
	7	4.17083	3.805	3.84	5.57	4.41	4.2375	4.54	4.905		4.43479	0.206176	8
	8	5.9	6.915	5.74167	5.28083	4.535	5.4025	5.31	4.945		5.50375	0.2519	8
	9	5.93083	7.07625	6.4625	6.49667	4.58583	5.24625	6.0595	6.5875		6.05567	0.283964	8
	10	6.48233	6.0425	7.48167	6.67833	6.0525	6.14333	6.315	5.96667		6.39529	0.177458	8
	11	7.1075	5.928	6.28	5.925	7.05917	5.3325	6.69583	5.7675		6.26194	0.226483	8

## Sheet: Fig 1c
	mFAM173B knockdown Von Frey
	veh: MM asODN										MEAN	SEM	N (mice)
	0	0.505747	0.542431	0.638757	0.729679						0.604154	0.0503715	4
	1	0.397589	0.356656	0.80272	0.667518						0.556121	0.107292	4
	4	0.559518	0.408652	0.848453	0.731571						0.637048	0.0965239	4
	5	0.674824	0.706155	0.706155	0.538518						0.656413	0.0399863	4
	6	0.574449	0.398	0.574449	0.618479						0.541344	0.0488953	4
	7	0.959344	0.405102	0.675046	0.610993						0.662621	0.114448	4
	8	0.680161	0.646833	0.803843	0.641855						0.693173	0.0378572	4
	9	0.521367	0.646833	0.324042	0.41211						0.476088	0.0697706	4
	10	0.535811	0.836854	0.485656	0.485656						0.585994	0.0844513	4
	11	0.477259	0.667518	0.675046	0.535811						0.588909	0.0490611	4
	veh: FAM173b asODN										MEAN	SEM	N (mice)
	0	0.713453	0.467817	0.667325	0.720273						0.642217	0.0593107	4
	1	0.456429	0.599864	0.694937	0.667518						0.604687	0.0533045	4
	4	0.384191	0.731571	0.397589	0.80272						0.579017	0.109616	4
	5	0.574449	0.492082	0.694937	0.736315						0.624446	0.0559045	4
	6	0.618479	0.402396	0.646833	0.646833						0.578635	0.0591254	4
	7	0.574449	0.48897	0.645598	0.731571						0.610147	0.0516065	4
	8	0.587046	0.675046	0.674387	0.849558						0.696509	0.0550425	4
	9	0.403289	0.682532	0.495465	0.696384						0.569418	0.0718697	4
	10	0.574449	0.466858	0.535811	0.574449						0.537892	0.0253688	4
	11	0.574449	1.00299	0.731571	0.643503						0.738129	0.0939598	4
	CFA: MM asODN										MEAN	SEM	N (mice)
	0	0.495871	0.63766	0.680836	0.68223	0.746815	0.838364	0.813008	0.719359		0.701768	0.0379602	8
	1	0.0205649	0.10074	0.0434699	0.0652681	0.0372059	0.0526808	0.0657898	0.074017		0.0574671	0.00872978	8
	4	0.0526808	0.0657898	0.0711903	0.092472	0.047681	0.0458599	0.0593908	0.0395106		0.0593219	0.00602814	8
	5	0.0426684	0.0495841	0.0326897	0.0352009	0.054067	0.0316605	0.0491217	0.0436462		0.0423298	0.00297595	8
	6	0.0588148	0.0844378	0.0452703	0.0353149	0.0689236	0.0426813	0.0632196	0.07903		0.0597115	0.00623403	8
	7	0.0376683	0.0555207	0.0741253	0.0372059	0.0896999	0.0513566	0.101169	0.0378731		0.0605773	0.00884033	8
	8	0.0638275	0.0535449	0.0413226	0.0375984	0.0529375	0.0660911	0.0431438	0.0662265		0.0530865	0.00408505	8
	9	0.055562	0.0315629	0.0452703	0.074017	0.0295608	0.0705403	0.0786297	0.0872762		0.0590524	0.0077498	8
	10	0.0376683	0.0353848	0.0592902	0.0375984	0.0541214	0.0660911	0.0889952	0.0769886		0.0570173	0.00699077	8
	11	0.04418	0.051372	0.0298099	0.061961	0.0496924	0.0769392	0.074017	0.110154		0.0622657	0.00876688	8
	CFA: FAM173b asODN										MEAN	SEM	N (mice)
	0	0.553277	0.623585	0.749251	0.533249	0.601424	0.719067	0.6363	0.753163		0.646165	0.0302893	8
	1	0.0725764	0.0422056	0.0675766	0.0802464	0.0638275	0.0725764	0.0541214	0.0645422		0.064709	0.00421038	8
	4	0.0327682	0.0620313	0.0541214	0.047681	0.0595425	0.0659828	0.0458599	0.0526808		0.0525835	0.00373567	8
	5	0.0376683	0.0448079	0.0303353	0.0576472	0.0588278	0.0473006	0.0659828	0.0500452		0.0490769	0.00413621	8
	6	0.0375392	0.0689236	0.0932123	0.0627366	0.130218	0.09159	0.0889952	0.192227		0.0956803	0.0167775	8
	7	0.108254	0.0716671	0.113117	0.173226	0.0616388	0.14431	0.202627	0.0844378		0.11991	0.017649	8
	8	0.104952	0.0711903	0.16407	0.147283	0.21683	0.130493	0.202704	0.192227		0.153719	0.0177998	8
	9	0.220823	0.164743	0.209061	0.110045	0.190162	0.0932842	0.315908	0.153265		0.182161	0.0247879	8
	10	0.172224	0.154651	0.21382	0.188233	0.173707	0.218474	0.248562	0.0618064		0.178935	0.0198637	8
	11	0.14431	0.111309	0.313603	0.142746	0.197071	0.119463	0.221705	0.327893		0.197263	0.0300041	8

## Sheet: Fig 1d
			mFAM173B knockdown SNI
			Ipsi: MM asODN						MEAN	SEM	N (mice)
			0	0.738257	1.01344	0.738257	0.738257		0.807053	0.0687964	4
			1	0.142308	0.151193	0.325276	0.02		0.159694	0.0627868	4
			2	0.0541817	0.0219995	0.115914	0.02		0.0530239	0.0223787	4
			3	0.02	0.02	0.02	0.02		0.02	0	4
			4	0.02	0.02	0.02	0.02		0.02	0	4
			5	0.02	0.02	0.02	0.02		0.02	0	4
			6	0.02	0.02	0.02	0.0219995		0.0204999	0.000499876	4
			7	0.02	0.02	0.02	0.02		0.02	0	4
			8	0.02	0.02	0.02	0.02		0.02	0	4
			9	0.02	0.02	0.02	0.02		0.02	0	4
			10	0.02	0.02	0.02	0.02		0.02	0	4
			Ipsi: FAM173b asODN						MEAN	SEM	N (mice)
			0	0.738257	0.738257	0.738257	0.993552		0.80208	0.063824	4
			1	0.142308	0.151193	0.196756	0.142308		0.158141	0.0130409	4
			2	0.295303	0.501319	0.02	0.0529124		0.217383	0.112806	4
			3	0.442954	0.541509	0.264947	0.164231		0.35341	0.0851536	4
			4	0.738257	0.813189	0.405377	0.0837759		0.510149	0.167491	4
			5	0.442954	0.334225	0.0787025	0.442954		0.324709	0.0859135	4
			6	0.295303	0.603894	0.295303	0.196756		0.347814	0.0884638	4
			7	0.115914	0.0681968	0.115914	0.410577		0.177651	0.0784524	4
			8	0.295303	0.295303	0.115914	0.442954		0.287368	0.0669136	4
			9	0.115914	0.02	0.118121	0.501319		0.188839	0.106642	4
			10	0.295303	0.334225	0.0541817	0.02		0.175927	0.0808517	4
			Contra: MM asODN						MEAN	SEM	N (mice)
			0	0.738257	0.938456	0.738257	0.738257		0.788306	0.0500498	4
			1	0.738257	0.738257	0.738257	0.902514		0.779321	0.0410644	4
			2	0.541509	1.01344	0.813189	0.751978		0.780029	0.0971511	4
			3	1.01344	0.738257	1.01344	0.738257		0.875849	0.0794392	4
			4	0.738257	0.738257	0.738257	0.738257		0.738257	0	4
			5	0.738257	0.738257	0.738257	0.738257		0.738257	0	4
			6	0.738257	0.738257	0.738257	0.738257		0.738257	0	4
			7	0.738257	0.738257	0.738257	0.738257		0.738257	0	4
			8	0.738257	0.738257	0.738257	0.442954		0.664431	0.0738257	4
			9	0.738257	0.738257	0.738257	0.603894		0.704666	0.0335907	4
			10	0.902514	0.738257	1.01344	0.738257		0.848117	0.0673486	4
			Contra: FAM173b asODN						MEAN	SEM	N (mice)
			0	0.738257	0.738257	0.902514	0.993552		0.843145	0.0633445	4
			1	0.738257	0.738257	0.738257	0.738257		0.738257	0	4
			2	0.738257	0.813189	0.738257	0.738257		0.75699	0.0187331	4
			3	0.738257	0.738257	0.738257	0.738257		0.738257	0	4
			4	0.738257	0.738257	1.01344	0.738257		0.807053	0.0687964	4
			5	0.738257	0.468294	0.738257	0.902514		0.71183	0.0899385	4
			6	0.738257	0.738257	0.738257	0.738257		0.738257	0	4
			7	0.738257	0.738257	0.738257	0.662368		0.719284	0.0189721	4
			8	0.738257	0.738257	0.738257	0.738257		0.738257	0	4
			9	0.738257	0.468294	0.738257	0.738257		0.670766	0.0674907	4
			10	1.2533	0.813189	0.738257	0.813189		0.904483	0.117605	4

## Sheet: Fig 2B
	Recovery experiment Hargreaves
	FAM173b asODN + HSV-FAM173b										MEAN	SEM	N (mice)
	Day 0	6.43	7.95	7.82	9.57333	6.81667	7.89	8.51	8.975		7.99563	0.368349	8
	Day 5	4.555	2.935	3.71	4.43	3.14	4.23	3.725	2.815		3.6925	0.240058	8
	Day 10	1.955	1.985	2.485	2.975	2.42	1.735	2.195	3.365		2.38938	0.19471	8
	FAM173b asODN + HSV-EV										MEAN	SEM	N (mice)
	Day 0	7.23667	7.87667	7.16	6.57	8.2	8.745	6.64667	8.105		7.5675	0.276764	8
	Day 5	3.66	2.905	2.785	4.295	3.705	3.135	3.505	3.025		3.37687	0.179409	8
	Day 10	6.285	7.135	5.455	7.295	5.45	6.705	6.31	5.73		6.29563	0.253999	8
	MM asODN + HSV-FAM173b										MEAN	SEM	N (mice)
	Day 0	9.77	8.355	7.305	6.34						7.9425	0.735092	4
	Day 5	5.085	3.3	2.99	2.6						3.49375	0.549406	4
	Day 10	1.645	3.32	1.57	2.905						2.36	0.442902	4
	MM asODN + HSV-EV										MEAN	SEM	N (mice)
	Day 0	6.69	8.225	8.87	7.76						7.88625	0.459118	4
	Day 5	4.835	2.98	3.095	3.825						3.68375	0.426929	4
	Day 10	3.055	2.83	3.095	2.98						2.99	0.0584166	4

## Sheet: Fig 2C
		Recovery experiment Von Frey
		FAM173b asODN + HSV-FAM173b										MEAN	SEM	N (mice)
		Day 0	0.53002	0.756986	0.706155	0.706155	0.191542	0.53002	0.62888	0.362049		0.551476	0.0684566	8
		Day 5	0.0317304	0.0426813	0.0263404	0.21683	0.0278893	0.0278893	0.0327813	0.055562		0.0577131	0.0229941	8
		Day 10	0.0390391	0.0749742	0.0855185	0.0327813	0.0469345	0.111309	0.0855185	0.0315906		0.0634582	0.0105404	8
		FAM173b asODN + HSV-EV										MEAN	SEM	N (mice)
		Day 0	0.848453	0.53002	0.265158	0.706155	0.848453	0.593106	0.752245	0.448155		0.623968	0.0723867	8
		Day 5	0.0558329	0.0278893	0.0278893	0.0557786	0.0558329	0.0278893	0.0187436	0.0557786		0.0407043	0.00580512	8
		Day 10	0.325639	0.62888	0.541421	0.21683	0.541421	0.265158	0.654829	0.624177		0.474794	0.062691	8
		MM asODN + HSV-FAM173b										MEAN	SEM	N (mice)
		Day 0	0.706155	0.706155	0.916187	0.325639						0.663534	0.123031	4
		Day 5	0.0278893	0.0688354	0.0688354	0.0278893						0.0483624	0.0118201	4
		Day 10	0.0426813	0.092472	0.0632196	0.0896999						0.0720182	0.0117936	4
		MM asODN + HSV-EV										MEAN	SEM	N (mice)
		Day 0	0.325639	0.362049	0.53002	0.706155						0.480966	0.087266	4
		Day 5	0.0331447	0.068194	0.0331447	0.0278893						0.0405932	0.00928328	4
		Day 10	0.0855185	0.0436062	0.0469345	0.068194						0.0610633	0.00980339	4

## Sheet: Fig 2d
	HSV-FAM173B + carrageenan Hargreaves
	Carrageenan + HSV-FAM173B												MEAN	SEM	N (mice)
	0	7.74722	7.95167	7.12	7.15833	6.83	9.29	7.74	6.51	8.115	8.23		7.66922	0.254771	10
	1	2.545	2.345	2.58	2.555	1.91	3.3	2.185	2.475	3.165	3.485		2.6545	0.159763	10
	6	2.815	2.115	2.785	3.225	2.455	2.71	1.7	2.57	2.565	1.82		2.476	0.149302	10
	1	2.775	4.075	3.71	3.88	2.095	3.82	1.82667	3.675	2.65	3.575		3.20817	0.254478	10
	2	4.4	4.745	4.49	4.205	2.74	3.91	1.845	2.585	4.845	4.035		3.78	0.324386	10
	4	4.14	4.03	4.13	4.80667	4.855	2.02	2.685	2.2925	3.28	2.465		3.47042	0.334238	10
	5	4.145	3.64	4.115	5.29333	4.145	4.165	3.385	5.32	3.64	3.64		4.14883	0.211952	10
	6	2.93	3.865	3.33	4.985	4.895	4.03	4.665	3.925	5.315	5.35		4.329	0.264603	10
	8	4.34	4.97	5.65	4.74333	2.825	5.61	5.025	4.56	5.265	6.07		4.90583	0.28574	10
	Carrageenan + HSV-EV												MEAN	SEM	N (mice)
	0	7.885	7.13667	6.41333	8.46	7.34	7.445	8.02	6.8	6.96	8.955		7.5415	0.248621	10
	1	2.17	2.2	2.38	2.125	3.485	2.09	1.975	2.515	3.74	2.885		2.5565	0.194993	10
	6	2.585	2.805	1.885	1.71	2.785	2.43	2.195	2.83333	3.125	1.65		2.40033	0.163525	10
	1	2.81	3.665	2.86	3.25	3.495	2.72333	3.045	3.5	4.345	2.685		3.23783	0.165886	10
	2	4.33	5.885	4.81	5.35	3.48	3.515	3.01	3.47	2.535	3.45		3.9835	0.339171	10
	4	4.905	6.06	4.94	6.58	6.645	7.83	3.475	6.75	7.02	3.85		5.8055	0.45522	10
	5	6.9	6.02	4.525	6.31	6.98	7.41	5.55	6.695	6.38	6.01		6.278	0.260081	10
	6	7.27	7.11	6.785	7.71	8.165	8.31	6.815	8.12	6.54	5.695		7.252	0.264089	10
	8	6.24	9.005	9.14	7.01	8.51	7.82	8.8	8.805	8.925	9.05		8.3305	0.313292	10
	Vehicle + HSV-EV												MEAN	SEM	N (mice)
	0	7.34	8.51	7.785	9.88	7.385	7.91						8.135	0.389585	6
	1	7.01	6.06	6.51	6.115	7.08	6.7						6.57917	0.17709	6
	6	7.365	8.28	7.66	6.67	7.89	6.93						7.46583	0.245704	6
	1	7.14	7.29	6.725	7.54	9.11	6.91						7.4525	0.351311	6
	2	7.75	8.495	6.545	9.655	7.82667	7.42						7.94861	0.428726	6
	4	8.27	6.275	8.57	6.25	6.215	6.715						7.04917	0.441545	6
	5	7.18	8.21	7.955	8.065	7.275	8.405						7.84833	0.206105	6
	6	7.295	7.36	7.27	8.02	8.755	8.16						7.81	0.246235	6
	8	7.07	7.06	7.18	6.97333	7.095	7.1						7.07972	0.0273875	6
	Vehicle + HSV-EV												MEAN	SEM	N (mice)
	0	7.425	7.75	8.83	8.51	8.02	8.815						8.225	0.238258	6
	1	7.155	7.685	8.1	7.885	8.43	7.385						7.77333	0.19073	6
	6	7.63	6.135	7.29	8.115	6.405	6.91						7.08083	0.305252	6
	1	7.61	7.66	8.155	8.515	7.755	7.45						7.8575	0.163058	6
	2	7.765	6.78	7.51	7.00333	7.015	7.12						7.19889	0.149557	6
	4	6.835	7.515	7.74	7.23	6.745	6.515						7.09667	0.194691	6
	5	6.44	7.07	7.44	7.225	7.29	7.955						7.23667	0.20189	6
	6	9.215	8.495	8.66	7.68	7.36667	7.185						8.10028	0.329861	6
	8	6.545	7.29	6.77	7.405	6.33	6.815						6.85917	0.170506	6

## Sheet: Fig 2e
	HSV-FAM173B + carrageenan Von Frey
	Carrageenan + HSV-FAM173B												MEAN	SEM	N (mice)
	0	0.53002	0.53002	0.706155	0.53002	0.848453	0.848453	0.541421	0.62888				0.645428	0.0494929	8
	1	0.02	0.02	0.0278893	0.02	0.0278893	0.0278893	0.0317304	0.0278893				0.025411	0.00164935	8
	6	0.0278893	0.02	0.02	0.02	0.0278893	0.0278893	0.0278893	0.0278893				0.0249308	0.0014436	8
	1	0.02	0.02	0.02	0.02	0.0278893	0.0436062	0.0195196	0.0278893				0.024863	0.00296639	8
	2	0.02	0.02	0.0263404	0.0234672	0.0278893	0.0278893	0.0278893	0.0278893				0.0251706	0.00124861	8
	4	0.0234672	0.02	0.0317304	0.0315906	0.092472	0.06836	0.0426813	0.06836				0.0473327	0.00921118	8
	5	0.0526808	0.02	0.0632196	0.0426813	0.0632196	0.0632196	0.06836	0.0436062				0.0521234	0.00571171	8
	6	0.092472	0.325639	0.092472	0.157874	0.0390391	0.0632196	0.055562	0.0426813				0.10862	0.0338353	8
	8	0.0855185	0.055562	0.155872	0.127618	0.092472	0.0426813	0.0469345	0.0317304				0.0797986	0.015597	8
	Carrageenan + HSV-EV												MEAN	SEM	N (mice)
	0	0.593106	0.593106	0.848453	0.53002	0.706155	0.756986	1.02399	0.62888	0.265158	0.624177		0.657003	0.0635477	10
	1	0.0526808	0.0278893	0.02	0.02	0.0278893	0.0317304	0.0278893	0.0317304	0.0278893	0.0278893		0.0295588	0.00286886	10
	6	0.0317304	0.0263404	0.02	0.02	0.0278893	0.0278893	0.0278893	0.0278893	0.0317304	0.0317304		0.0273089	0.00136535	10
	1	0.0390391	0.02	0.02	0.0278893	0.0278893	0.0390391	0.0278893	0.0278893	0.0263404	0.0278893		0.0283865	0.00203592	10
	2	0.0327813	0.02	0.0469345	0.0526808	0.0317304	0.0278893	0.0278893	0.0278893	0.0278893	0.0278893		0.0323574	0.0031245	10
	4	0.055562	0.039196	0.127618	0.0526808	0.294805	0.442743	0.21683	0.756986	0.541421	0.092472		0.262031	0.0775846	10
	5	0.21683	0.092472	0.541421	0.21683	0.848453	0.848453	0.231966	0.265158	0.265158	0.055562		0.35823	0.0912681	10
	6	0.706155	0.752245	0.325639	0.21683	0.362049	0.191542	0.706155	0.53002	0.706155	0.265158		0.476195	0.0719781	10
	8	0.706155	0.442743	0.325639	0.541421	0.541421	0.848453	0.541421	0.593106	0.448155	0.706155		0.569467	0.0481141	10
	Vehicle + HSV-EV												MEAN	SEM	N (mice)
	0	0.62888	0.756986	0.265158	0.648453	0.593106	0.53002						0.570434	0.0682265	6
	1	0.325639	0.448155	0.365158	0.442743	0.53002	0.53002						0.440289	0.0341372	6
	6	0.265158	0.62888	0.325639	0.59503	0.53002	0.442743						0.464578	0.0599569	6
	1	0.756986	0.365158	0.53002	0.442743	0.848453	0.541421						0.580797	0.0758004	6
	2	0.248453	0.62888	0.241421	0.316187	0.32888	0.348453						0.352046	0.0581498	6
	4	0.248155	0.341421	0.348453	0.53002	0.548453	0.593106						0.434935	0.0571712	6
	5	0.185507	0.442743	0.706155	0.748453	0.648453	0.53002						0.543555	0.085239	6
	6	0.541421	0.62888	0.656986	0.716187	0.53002	0.62888						0.617062	0.0288657	6
	8	0.848453	0.442743	0.748453	0.748453	0.593106	0.362049						0.623876	0.0782695	6
	Vehicle + HSV-EV												MEAN	SEM	N (mice)
	0	0.623991	0.448155	0.62888	0.62888	0.648453	0.53002						0.58473	0.0322214	6
	1	0.648155	0.593106	0.62888	0.642743	0.542743	0.706155						0.626963	0.0225185	6
	6	0.362049	0.348453	0.324177	0.53002	0.296187	0.348453						0.368223	0.0337279	6
	1	0.356986	0.213114	0.556986	0.470235	0.370235	0.359853						0.387902	0.0476004	6
	2	0.356986	0.371421	0.326155	0.348155	0.29888	0.32888						0.338413	0.010541	6
	4	0.398627	0.448155	0.306155	0.53002	0.33002	0.348453						0.393571	0.0343216	6
	5	0.541421	0.756986	0.326155	0.541421	0.511421	0.593106						0.545085	0.0566564	6
	6	0.413114	0.448453	0.656986	0.62888	0.470235	0.506155						0.520637	0.0407552	6
	8	0.265158	0.506155	0.541421	0.448155	0.53002	0.506155						0.466177	0.0422957	6

## Sheet: Fig 2f
			Dynamic weight bearing
			HSV-EV								MEAN	SEM	N (mice)
			0	0.989985	1.01169	1.04262	0.86678	1.02869			0.987953	0.0315424	5
			1	0.809597	0.893551	1.09129	0.779783	0.742069			0.863259	0.0622306	5
			9	1.01661	1.089	0.990223	0.935512	0.978182			1.0019	0.0254057	5
			19	1.00692	1.00119	1.09611	0.972425	1.03457			1.02224	0.0209385	5
			HSV-FAM173B								MEAN	SEM	N (mice)
			0	1.03456	0.980462	1.01787	0.981994	1.02858			1.0087	0.0115305	5
			1	0.745401	0.935843	0.963664	0.94234	0.867537			0.890957	0.0397972	5
			9	0.813231	0.868843	0.914019	0.825176	0.967078			0.877669	0.028549	5
			19	0.891413	1.08231	0.838067	0.658947	0.799236			0.853994	0.0688561	5

## Sheet: Fig 2g
	Conditioned Place Preference
	EV	hFAM173B
	-127.72	68
	-45.55	12
	78	237.15
	15.6	31.9
	74.8	209.2
	43	161.42
	51
Mean	12.7329	119.945
SEM	28.2947	38.9555
N (mice)	7	6

[truncated: 51 more sheets: Fig 3d, Fig 3e, Fig 5a, Fig 5b, Fig 5c, Fig 5d, Fig 5e, Fig 5f, Fig 5g, Fig 6a, Fig 6b, Fig 6c, Fig 6d, Fig 6e, Fig 7a, Fig 7b, Fig 7d, Fig 7e, Fig 7g, Fig 7h …]
